# Supplementary material for: Microglia-derived TGF-β1 ligand maintains microglia homeostasis via autocrine mechanism and is critical for normal cognitive function in adult mouse brain
Source: PubMed Central journal article supplement — bioRxiv. 2023 Jul 7:2023.07.05.547814. Preprint. [Version 1] doi: 10.1101/2023.07.05.547814 (PMC10349967; doi:10.1101/2023.07.05.547814), 2023-07-07
Supplement: NIHPP2023.07.05.547814v1-supplement-2.pdf [file NIHPP2023.07.05.547814v1-supplement-2.pdf]

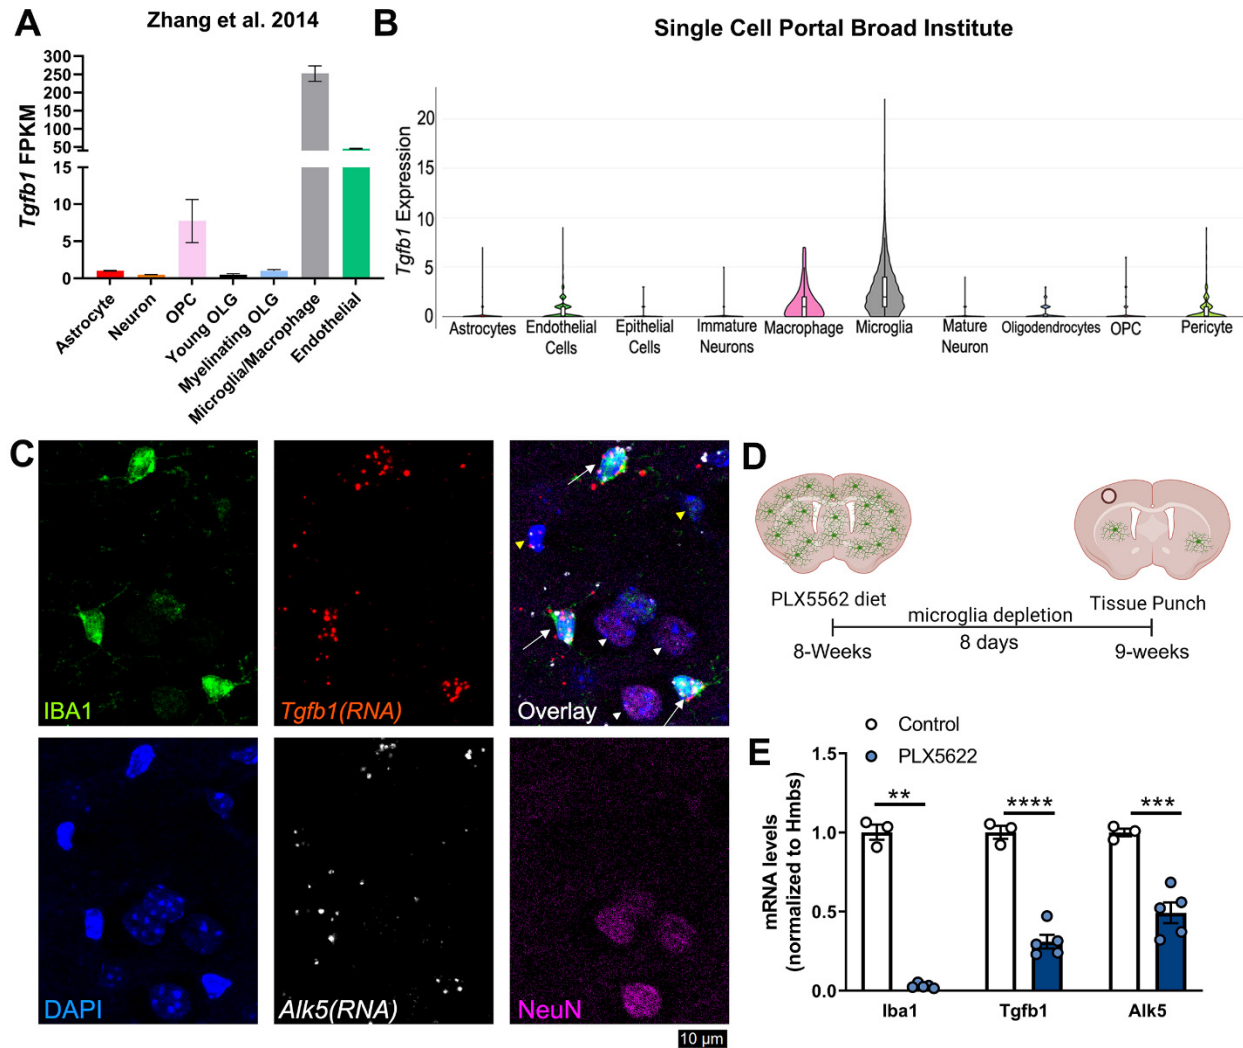

**Supplementary Figure 1. *Tgfb1* gene expression is enriched in microglia in adult mouse brains.** (A, B) Publicly available single-cell RNA-sequencing showing microglial enrichment for *Tgfb1* expression from Zhang et. al 2014 (A) showing fragments per kilobase of transcript per million reads mapped (FPKM) and a second independent Single-cell portal data set<sup>1</sup> (B) showing similar microglial enrichment of the *Tgfb1* expression among different cell types. (C) Representative images using combined RNA-scope/Immunohistochemistry visualizing RNA-scope in situ signal for *Tgfb1* mRNA and *Tgfb1* (*Alk5*) mRNA combined with IHC for IBA1 and NEUN showing colocalization of *Tgfb1* and *Alk5* mRNA with IBA1+ microglia (white arrow) but not in NEUN+ neurons (white arrowhead). Note some *Tgfb1* mRNA signals in IBA1-cells (yellow arrowhead). (D) Experimental timeline for PLX5562 ablation of microglia, (E) microglia ablation leads to a significant decrease of *Iba1*, *Tgfb1*, and *Alk5* mRNA levels (normalized to Hmbs). Mean±SE, \*\* = p<0.001, \*\*\* = p<0.0005, \*\*\*\* = P<0.0001, Student's t-test (each data point represents an individual animal).

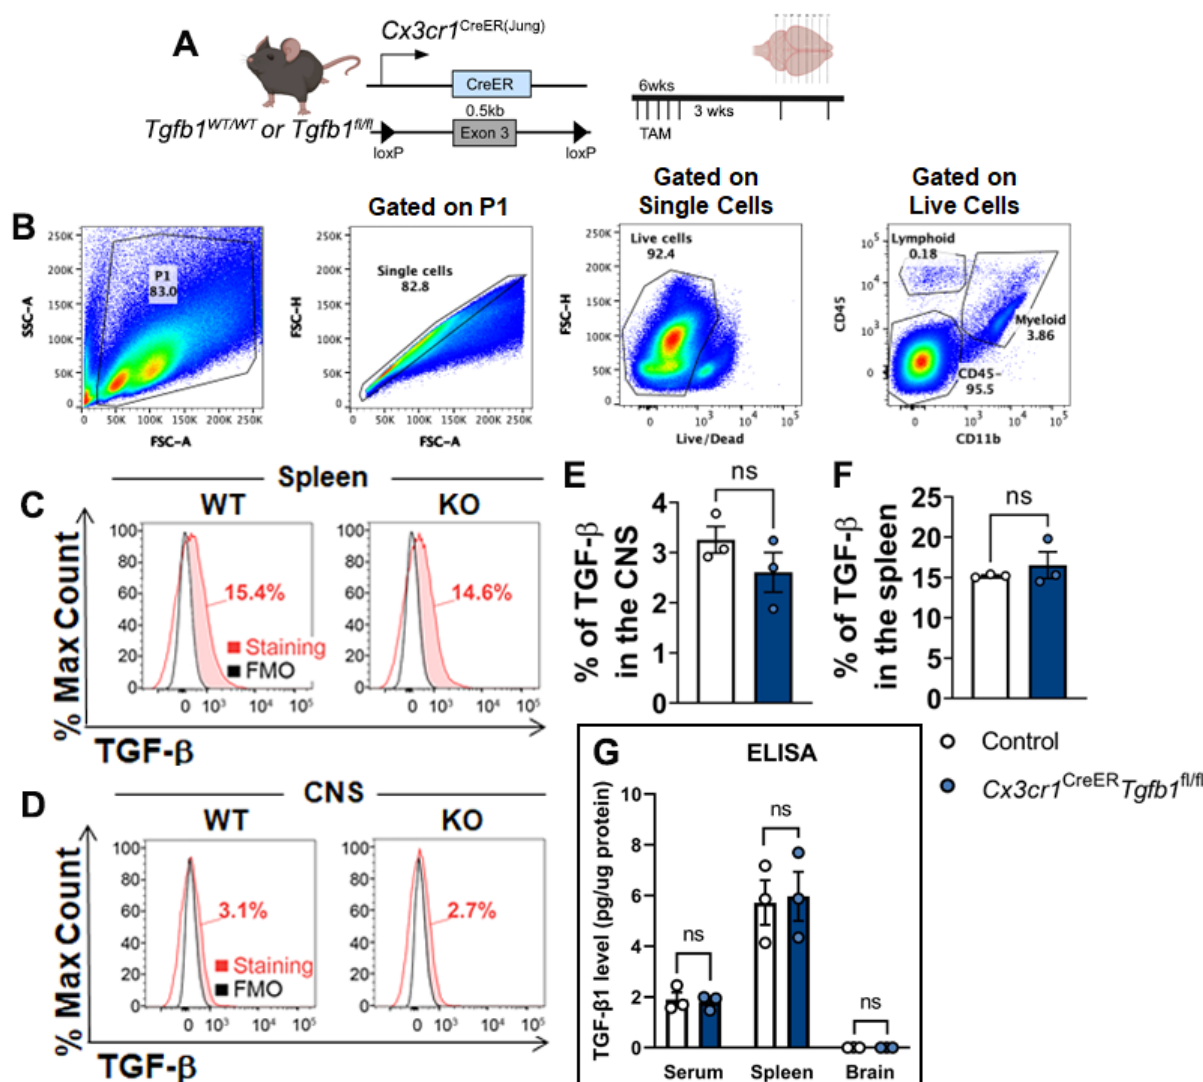

**Supplementary Figure 2. FACS or ELISA detection of TGF-β1 protein in the brain, serum, and spleen in WT or MG-*Tgfb1* iKO mice.** (A) Timeline for using *Cx3cr1*<sup>CreER</sup> driver to target myeloid cell inducible *Tgfb1* loss (samples were harvested at 3 weeks post TAM). (B) Gating strategy for identifying the myeloid cells in single-cell suspension. Cells were first gated according to FSC-SSC, then restricted to single cells and live cells. Myeloid cells were identified as CD45<sup>+</sup> CD11b<sup>+</sup>. (C, D) FACS analyses of TGF-β expression by myeloid cells in the spleen (top histograms) and in the CNS (lower histograms). The fluorescence minus one (FMO) is represented in black histograms and TGF-β immunostaining is shown in red. TGF-β staining above the background (FMO) is shown in solid red and represents the percentage shown for each analysis. (E, F) Compilation of TGF-β expression by flow cytometry on myeloid cells from the spleen and CNS of WT and KO mice. (G) ELISA quantification (pg/μg total protein) from serum and tissue from the spleen and brain (n = 3 mice per group) showing no difference in TGF-β protein levels in serum or spleen of *Cx3cr1*<sup>CreER</sup>-*Tgfb1*<sup>fl/fl</sup> iKO or control mice and that the brain TGF-β ligand levels are below the detection limit of the kit. Mean ± SE, Student's t-test (each data point represents a single animal).

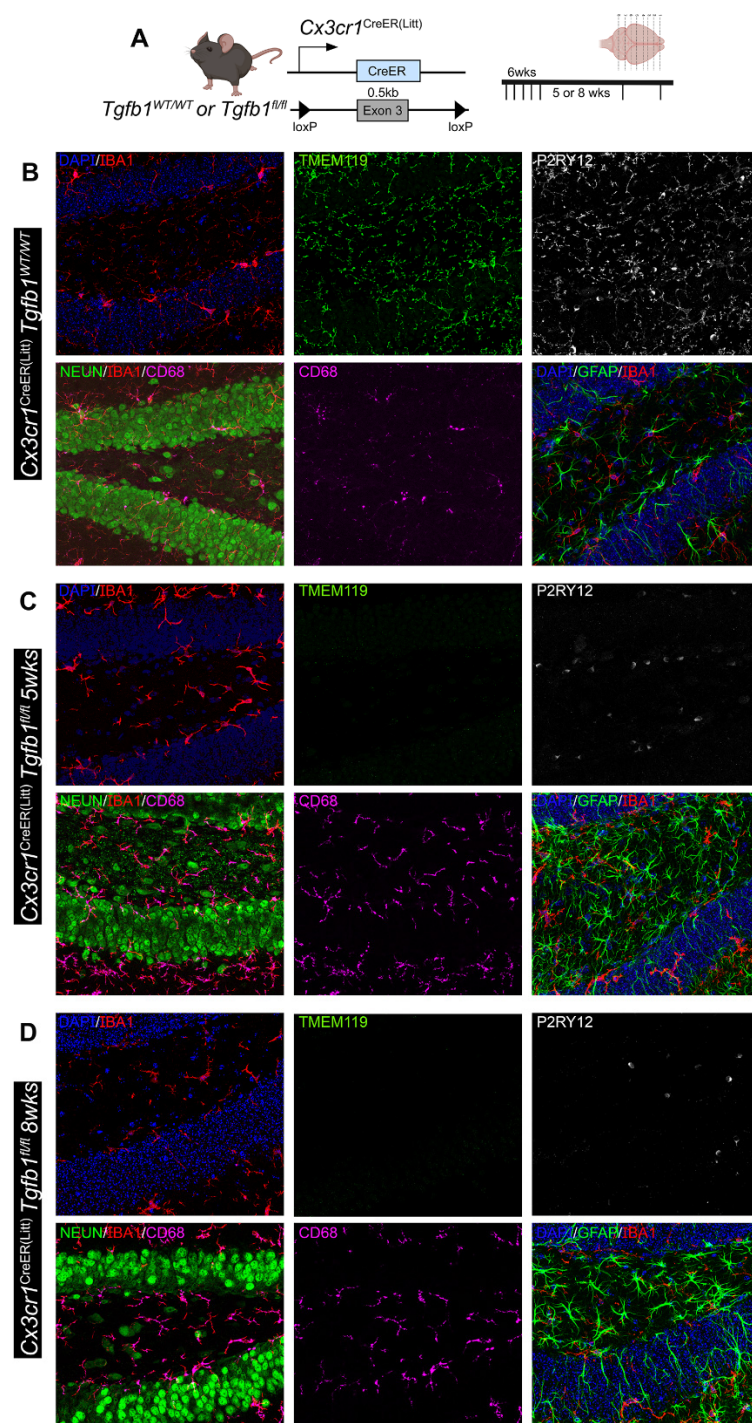

**Supplemental Figure 3. Microglia-specific *Tgfb1* gene deletion results in loss of homeostasis of microglia and increase in reactive astrocytes in the hippocampus of the adult mouse brain.** (A) Mouse model for targeting microglial *Tgfb1* and timeline. (B) Representative immunohistochemistry images of IBA1, TMEM119, P2RY12, CD68, NeuN, and GFAP in the hippocampus of (C) Control animals, (D) *Cx3cr1*<sup>CreER(Litt)</sup>*Tgfb1*<sup>fl/fl</sup> knockouts 5 weeks after tamoxifen administration, and (E) *Cx3cr1*<sup>CreER(Litt)</sup>*Tgfb1*<sup>fl/fl</sup> knockouts 8 weeks after tamoxifen administration. Representative results from n=3-5 mice/group, Scale bar = 100µm.

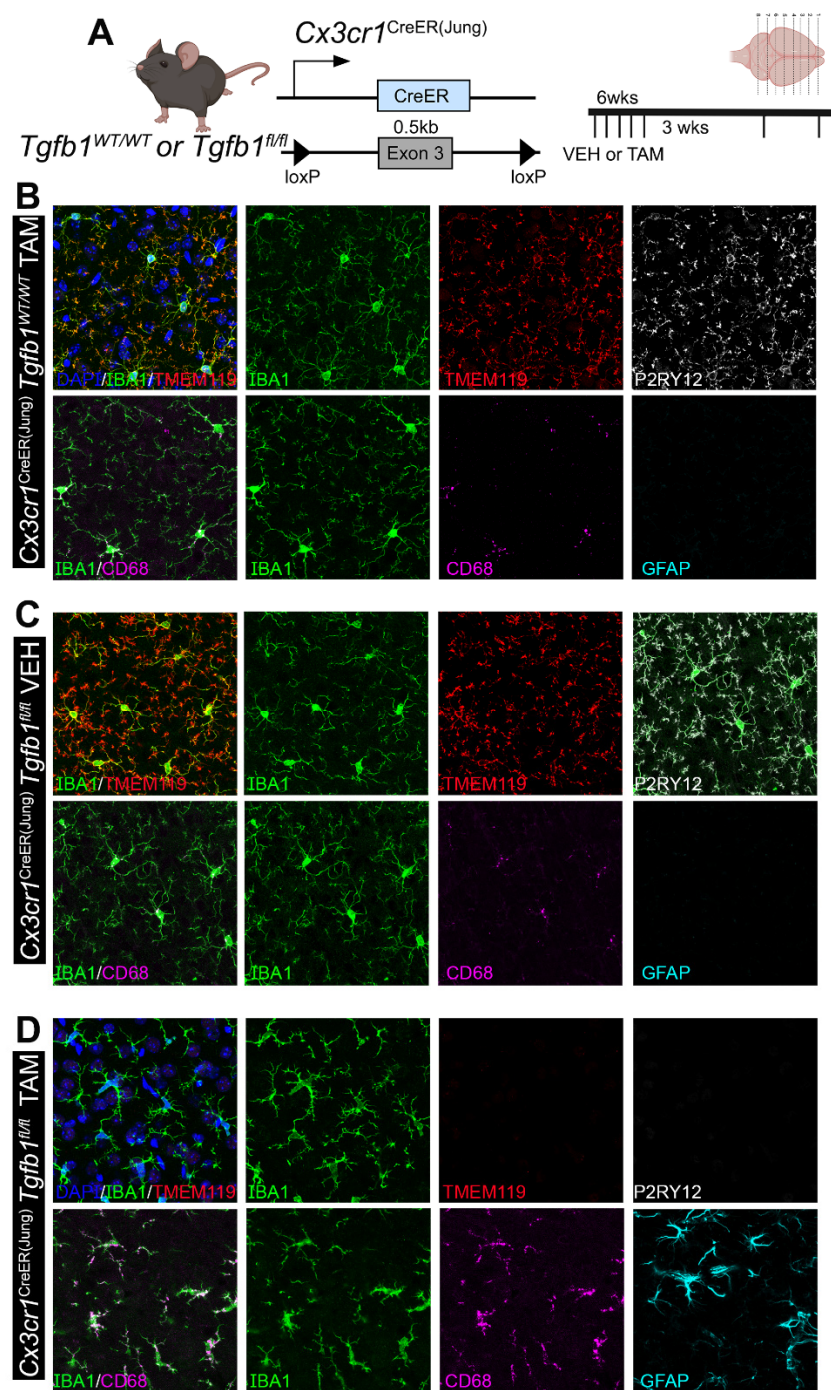

**Supplemental Figure 4. Microglia specific *Tgfb1* gene deletion in a second independent *Cx3cr1*<sup>CreER(Jung)</sup> driver line results in a similar phenotype of loss of homeostasis of microglia and an increase in reactive astrocytes in the cortex of adult mouse brain.** (A) Mouse model for targeting microglial *Tgfb1* and timeline. (B-D) Representative images for immunohistochemistry looking at IBA1, TMEM119, P2RY12, CD68, and GFAP in (B) Control *Cx3cr1*<sup>CreER(Jung)</sup> *tgfb1* wt/wt +TAM animals, (C) *Cx3cr1*<sup>CreER(Jung)</sup> *Tgfb1*<sup>fl/fl</sup> mice + Veh control and (D) *Cx3cr1*<sup>CreER(Jung)</sup> *Tgfb1*<sup>fl/fl</sup> mice + TAM at 3 weeks after tamoxifen administration. Representative results from n=3-5 mice/group, Scale bar = 100µm.

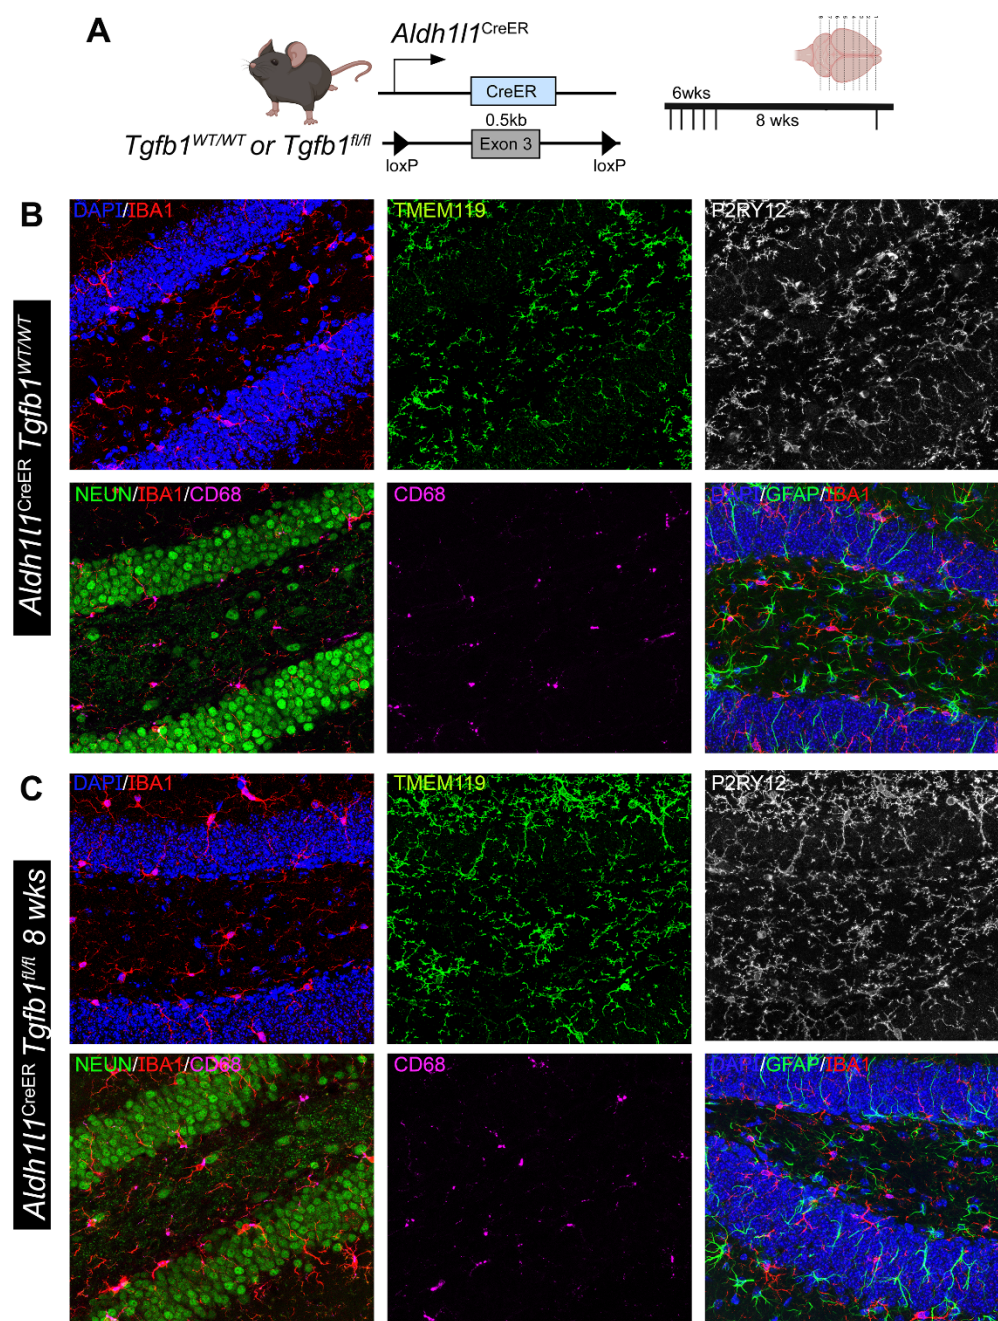

**Supplementary Figure 5. Astrocyte-specific *Tgfb1* gene deletion in the *Aldh1l1*<sup>CreER</sup> driver does not affect the homeostasis of microglia or GFAP expression in astrocytes in adult mouse brain (hippocampus).** (A) Astrocyte iKO mouse model and experimental timeline. (B,C) Representative immunohistochemistry images of hippocampus from TAM treated (8 weeks post) control (B) *Aldh1l1*<sup>CreER</sup> *Tgfb1*<sup>WT/WT</sup> and (C) iKO *Aldh1l1*<sup>CreER</sup> *Tgfb1*<sup>fl/fl</sup> tissue showing IBA1, TMEM119, P2RY12, CD68, and GFAP immunostaining. Representative results from n=3-5 mice/group, Scale bar = 100µm.

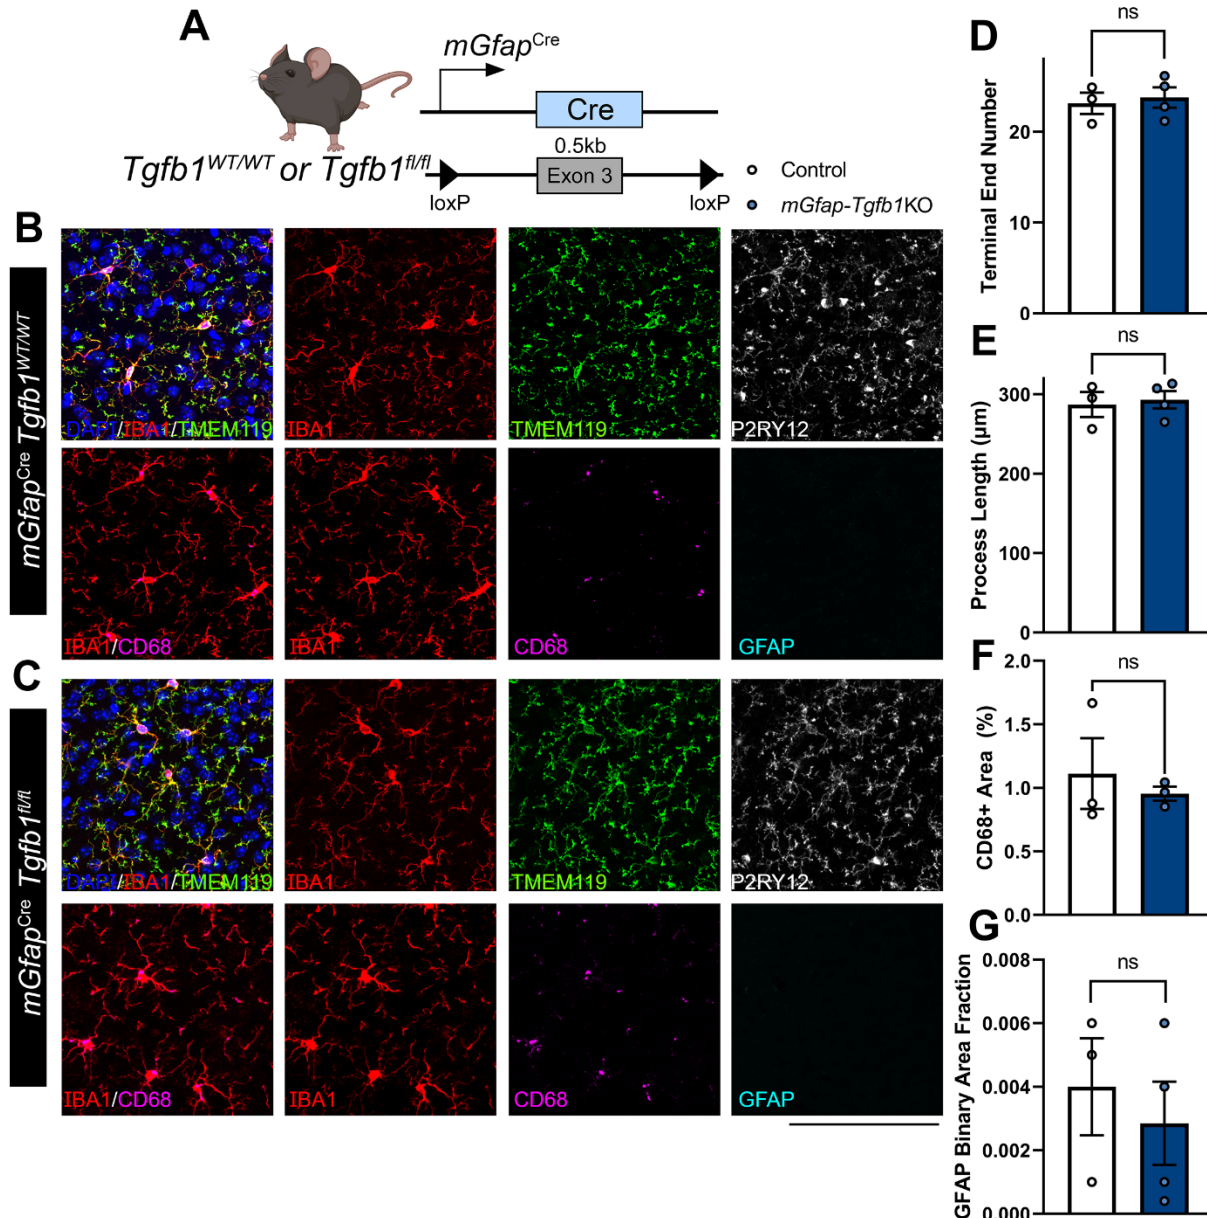

**Supplementary Figure 6. Astrocyte-specific *Tgfb1* gene deletion in the perinatal constitutive mGfap<sup>Cre</sup> driver line does not affect the homeostasis of microglia or GFAP expression in astrocytes in adult mouse brain (cortex).** (A) Astrocyte constitutive KO mouse model used and experimental timeline. (B,C) Representative images of control *mGfap<sup>Cre</sup>Tgfb1<sup>wt/wt</sup>* (B) and cKO *mGfap<sup>CreER</sup>Tgfb1<sup>fl/fl</sup>* tissue showing IBA1, TMEM119, P2RY12, CD68, and GFAP immunostaining. Quantification of microglia ramification via (D) terminal end number, (E) process length, and (F) CD68+ immunoreactive % area. (G) Quantification of astrocyte reactivity using GFAP+ immunoreactive area fraction. (control n=3; cKO n=4) ns=not significant. Mean±SE, Scale bar = 100µm.

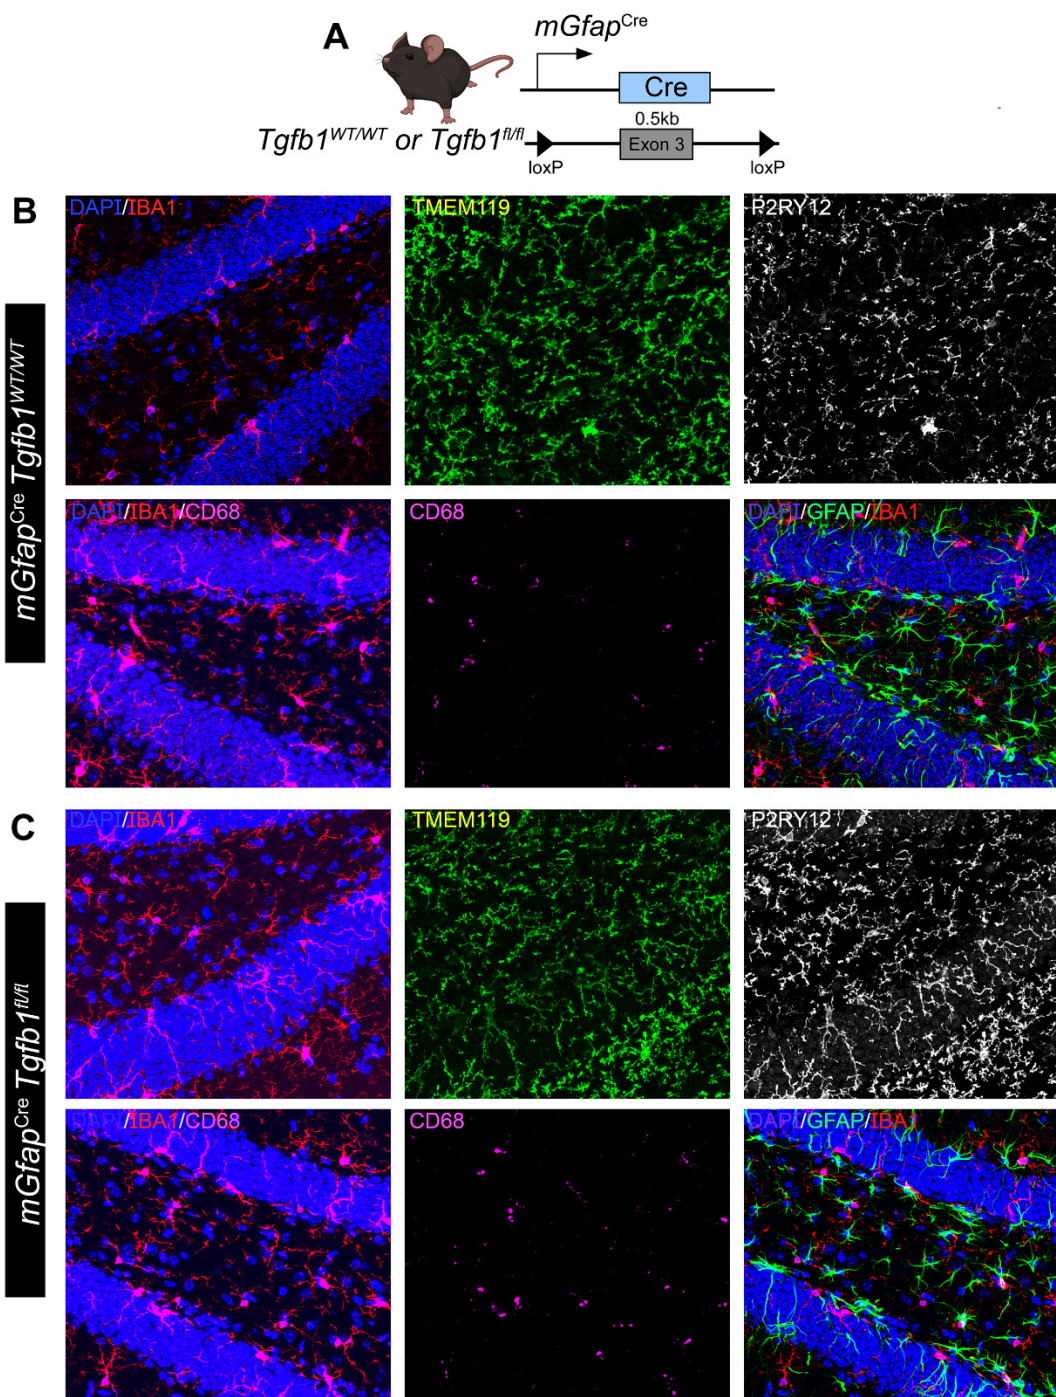

**Supplemental Figure 7. Astrocyte-specific *Tgfb1* gene deletion in the perinatal constitutive *mGfap<sup>Cre</sup>* driver line does not affect the homeostasis of microglia or GFAP expression in astrocytes in the adult mouse brain (hippocampus).** (A) Astrocyte constitutive KO mouse model used and experimental timeline. (B, C) Representative images of control *mGfap<sup>Cre</sup>Tgfb1<sup>wt/wt</sup>* (B) and cKO *mGfap<sup>CreER</sup> Tgfb1<sup>fl/fl</sup>* tissue showing IBA1, TMEM119, P2RY12, CD68, and GFAP immunostaining. Representative results from n=3-5 mice/group. Scale bar = 100 $\mu$ m.

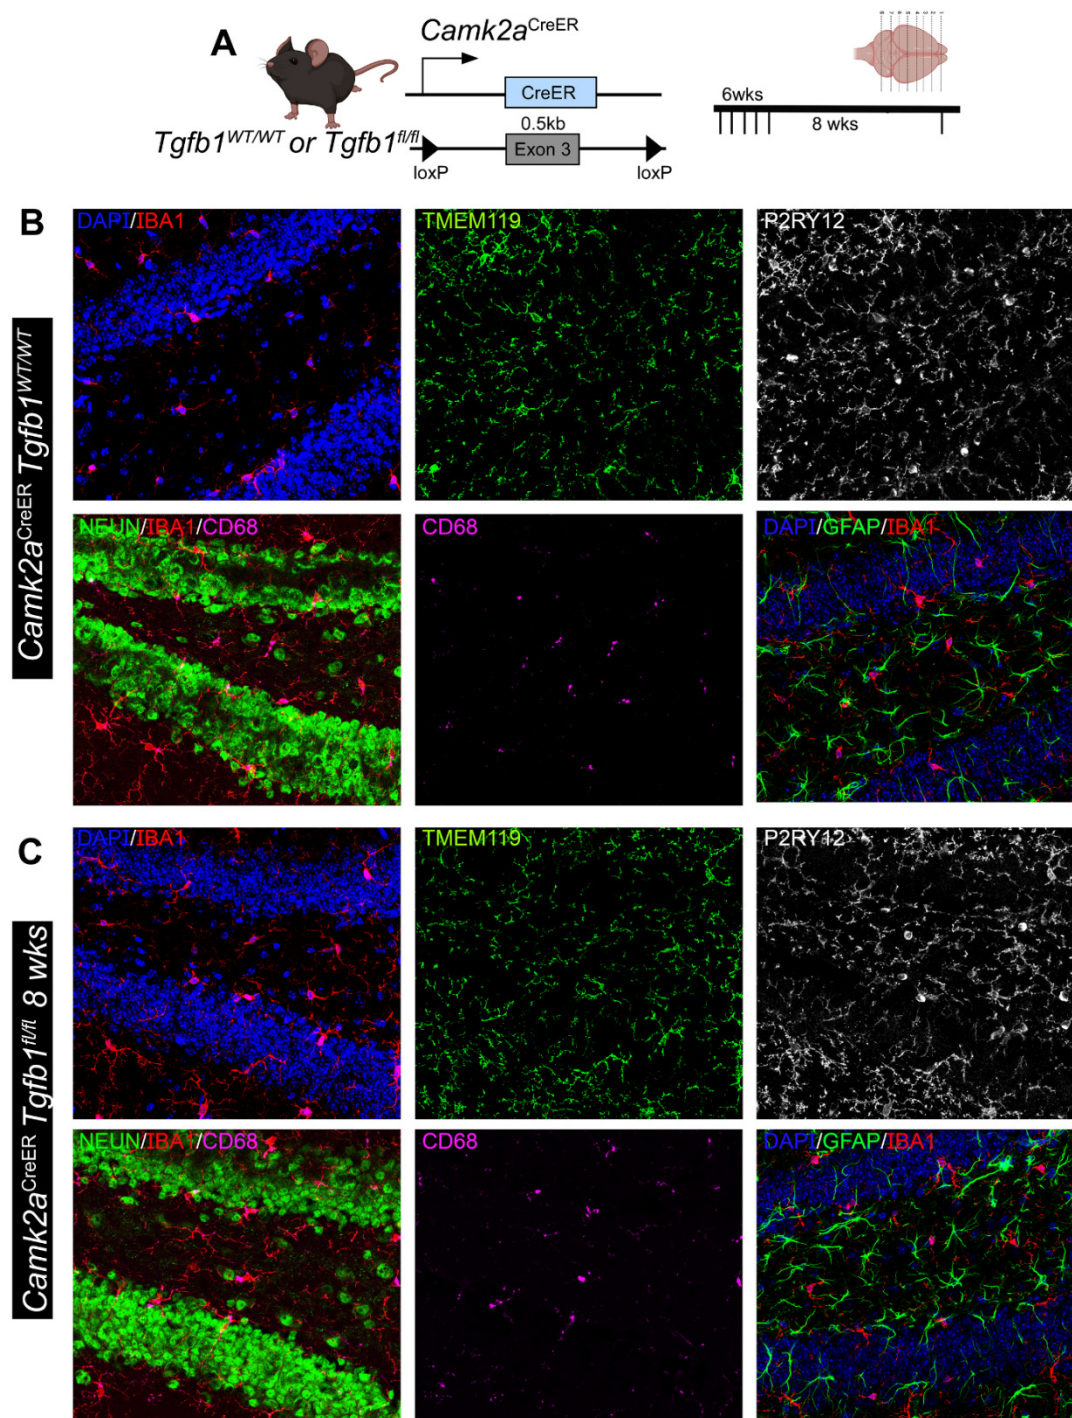

**Supplementary Figure 8. Forebrain neuronal specific *Tgfb1* gene deletion in the *Camk2a*<sup>CreER</sup> driver does not affect the homeostasis of microglia or GFAP expression in astrocytes in the adult mouse brain (hippocampus).** (A) Neuron iKO mouse model used and experimental timeline. (B,C) Representative images of control *Camk2a*<sup>CreER</sup> *Tgfb1*<sup>WT/WT</sup> (B) and iKO *Camk2a*<sup>CreER</sup> *Tgfb1*<sup>fl/fl</sup> tissue showing IBA1, TMEM119, P2RY12, CD68, and GFAP. Representative results from n=3-5 mice/group. Scale bar = 100μm.

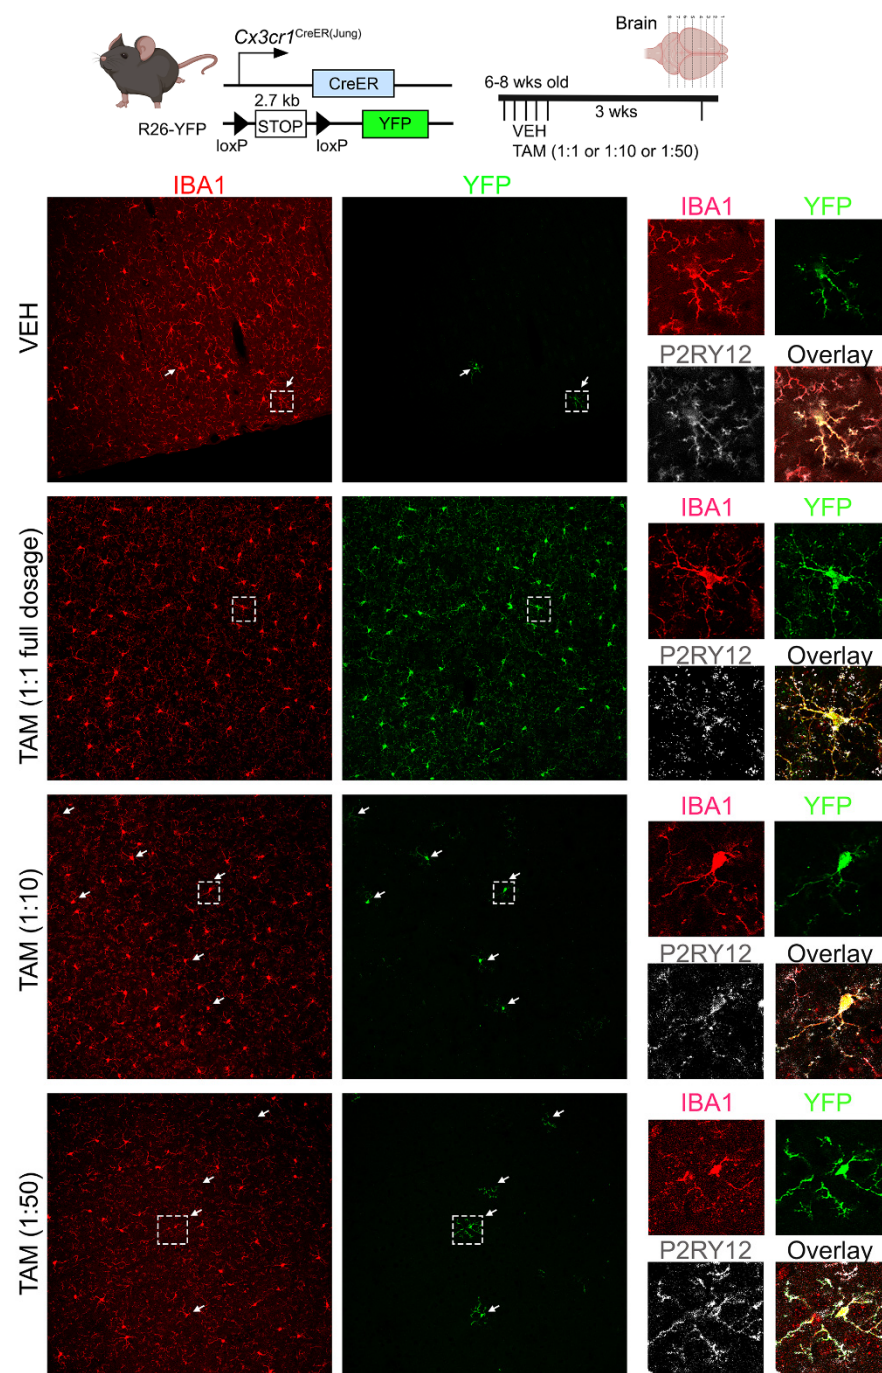

**Supplemental Figure 9. Titration of Tamoxifen dosage to enable sparse recombination of a floxed allele in single microglia in adult mouse brain.** (A) The reporter mouse model used to test recombination efficiency in floxed reporter allele. (B-E) Representative IHC images showing IBA1, YFP, and P2RY12 labeling from (B) vehicle-treated, (C) full TAM (180mg/kg) dosage, (D) 1:7-1:10 TAM dosage, and (E) 1:50 TAM dosage treated brain tissue. We observed similar recombination efficiency which lead to sparse labeling in individual microglia in 1:7-1:10 TAM dosage in our study. P2RY12 expression indicates that parenchyma microglia are recombined. Representative results from n=3-5 mice/group. Scale Bar = 100µm.

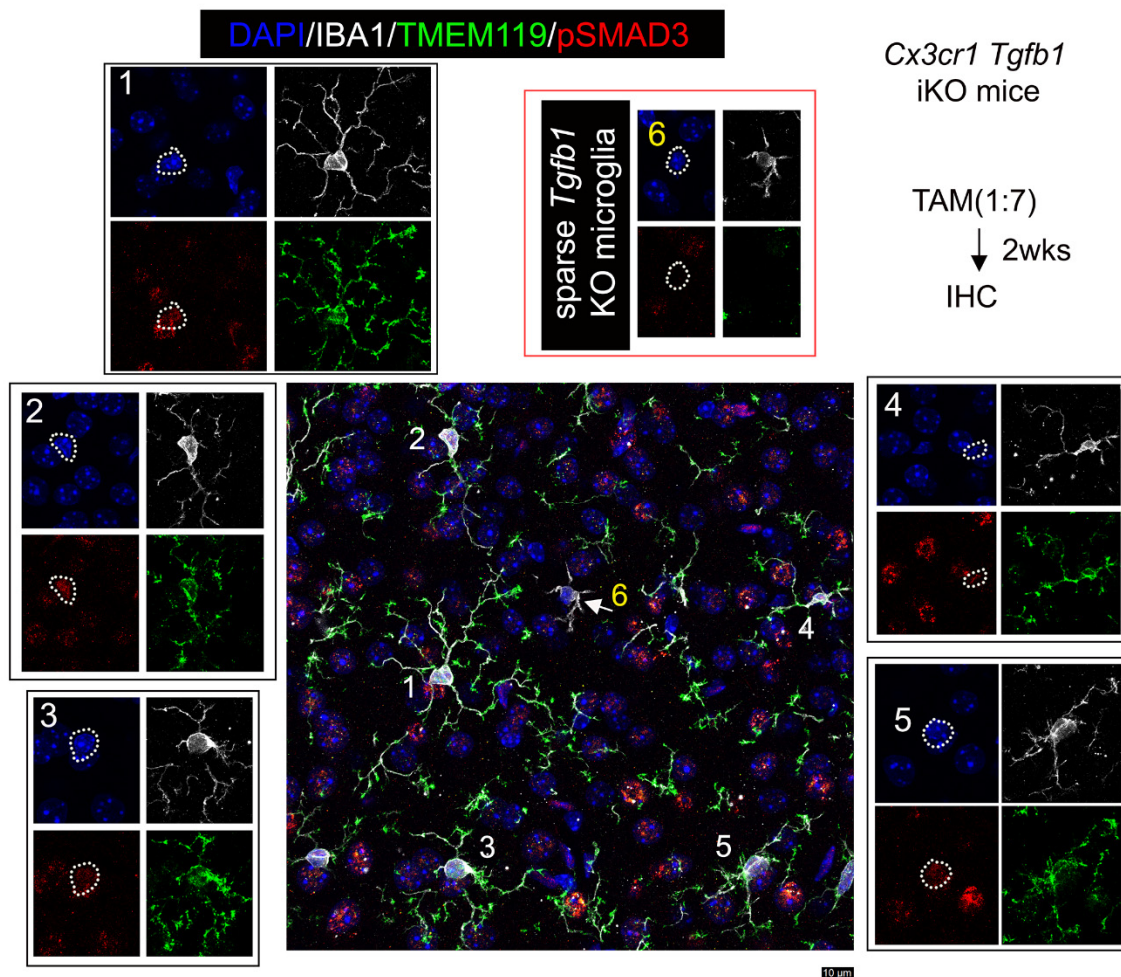

**Supplemental Figure 10. Additional representative pSMAD3 immunostaining labeling confirms the downregulation of TGF- $\beta$  downstream signaling in dyshomeostatic individual microglia in the sparse *Tgfb1* iKO model.** (A) Mouse model used to examine sparse iKO in microglia and experimental timeline with TAM dosage. (B) Representative image showing co-immunohistochemical staining with DAPI, IBA1, TMEM119, and pSMAD3. (B1-5) Surrounding normal microglia showing TMEM119 expression and pSMAD3 immunostaining. (B6) A single microglia cell with loss of TMEM119 expression and loss of pSMAD3 labeling. White arrow (microglia #6) marks the sparse recombined individual iKO microglia. Representative results from n=3 iKO mice. Scale bar = 10 $\mu$ m.

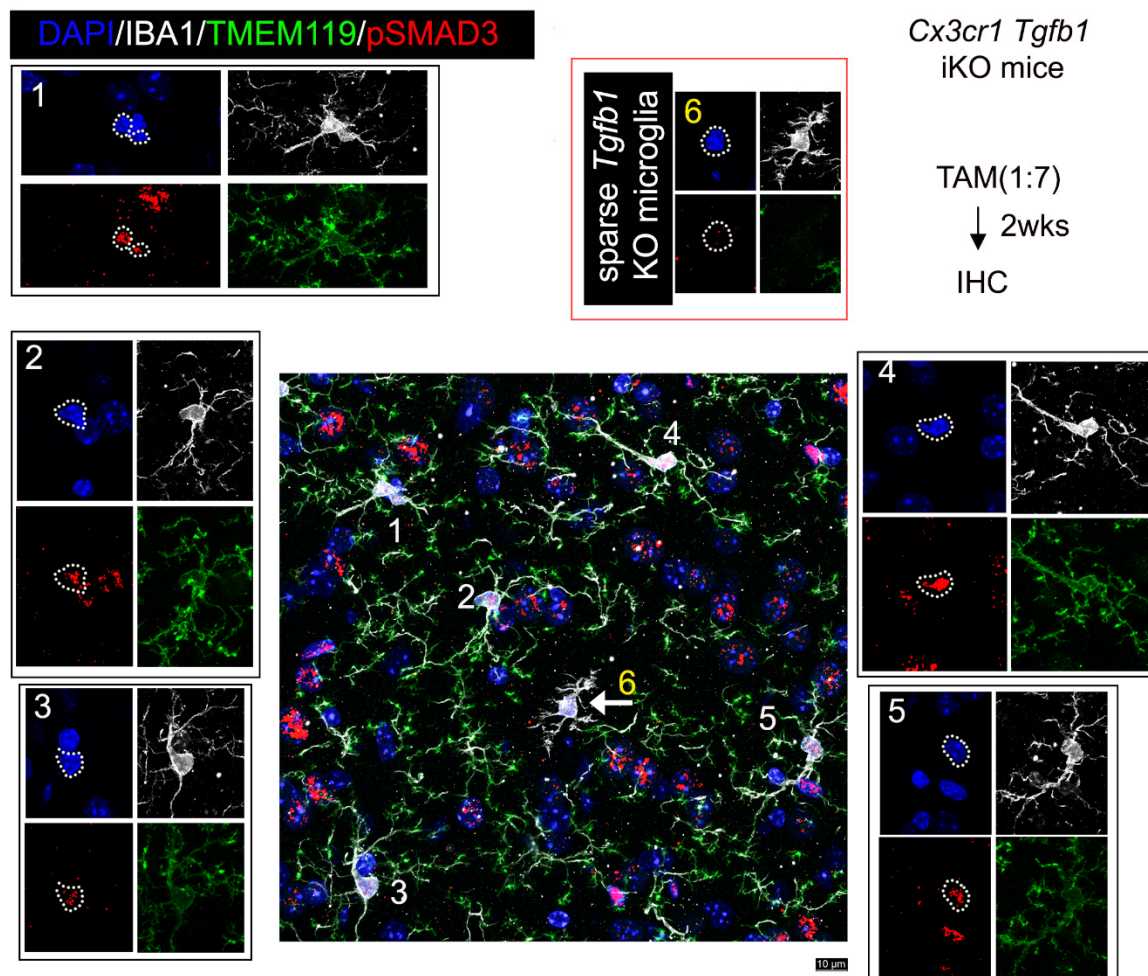

**Supplemental Figure11. Additional representative pSMAD3 immunostaining labeling confirms the downregulation of TGF- $\beta$  downstream signaling in dyshomeostatic individual microglia in the sparse *Tgfb1* iKO model.** (A) Mouse model used to examine sparse iKO in microglia and experimental timeline with TAM dosage. (B) Representative image showing co-immunohistochemical staining with DAPI, IBA1, TMEM119, and pSMAD3. (B1-5) Surrounding normal microglia showing TMEM119 expression and pSMAD3 immunostaining. (B6) A single microglia cell with loss of TMEM119 expression and loss of pSMAD3 labeling. White arrow (microglia #6) marks the sparse recombined individual iKO microglia. Representative results from n=3 iKO mice. Scale bar = 10 $\mu$ m.

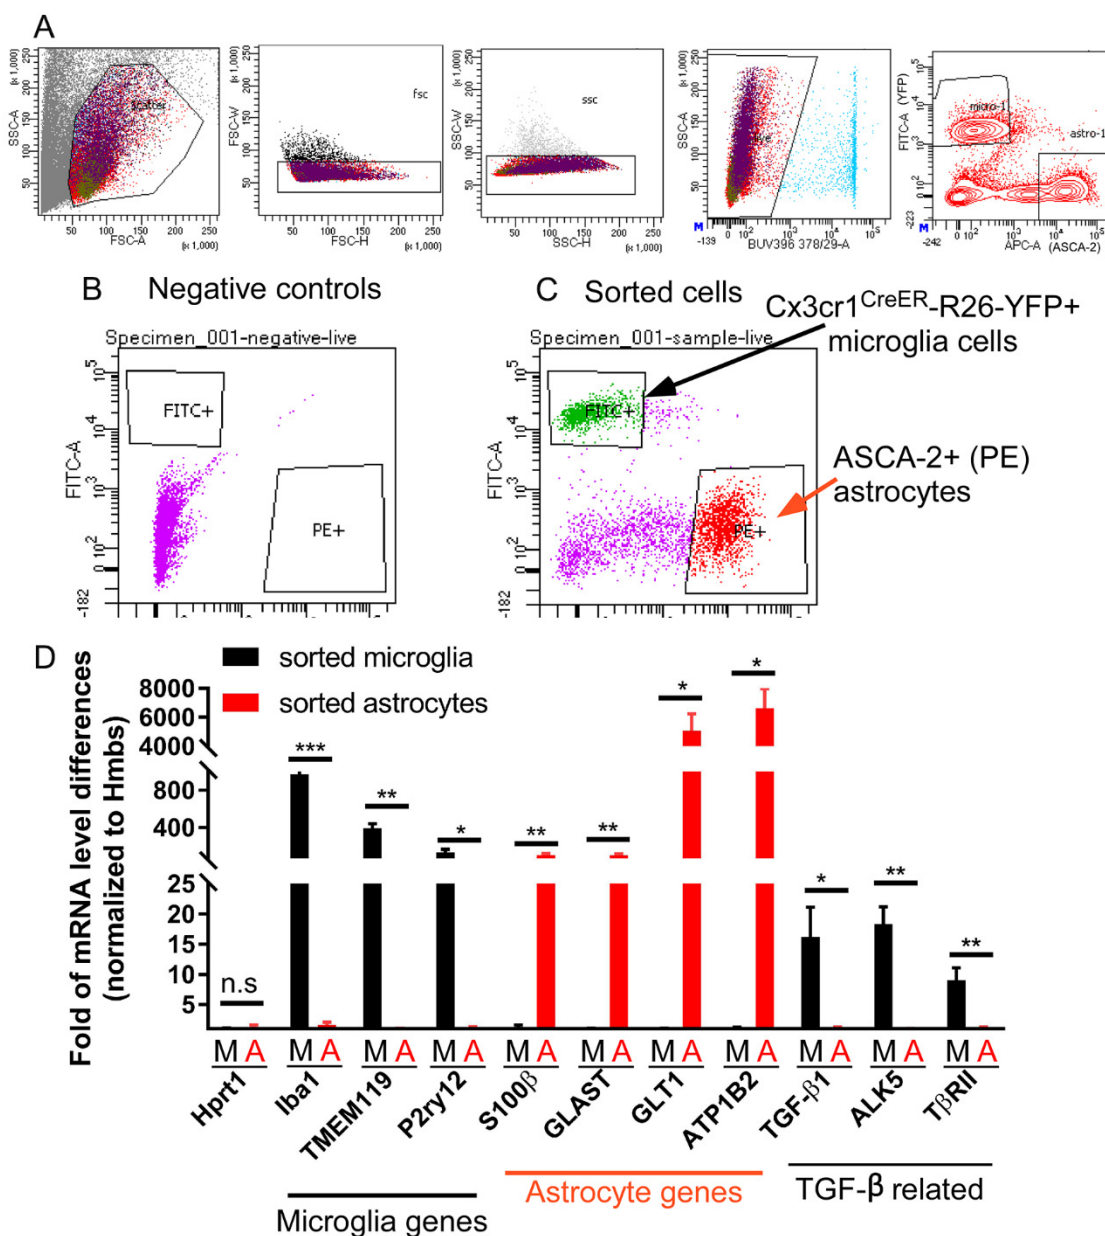

**Supplementary Figure 12. Simultaneous sorting of microglia and astrocyte from the same mouse brain and subsequent RNA extraction and qRT-PCR supporting efficient sorting of microglia and astrocytes from the same brain.** (A) Gating strategies for isolation of microglia based on TAM-induced R26-YFP expression and ASCA-2 staining on astrocytes. (B) Examples of unstained samples from a non-TAM treated and non-immunostained brain sample (left) and TAM-treated Cx3cr1CreER-R26-YFP mice that is stained with ASCA-2 antibodies. (C) The purity of sorted cells was validated using qRT-PCR by cell type-specific marker expression for microglia and astrocytes respectively. Note that TGF $\beta$ 1 (ligand) and both type I (ALK5) and type II (TbRII) receptors are substantially enriched in microglia compared to astrocytes. \*, \*\*, and \*\*\*  $p < 0.05, 0.01, 0.001$ . Student's t-test,  $n = 4$  brains.

# Microglia

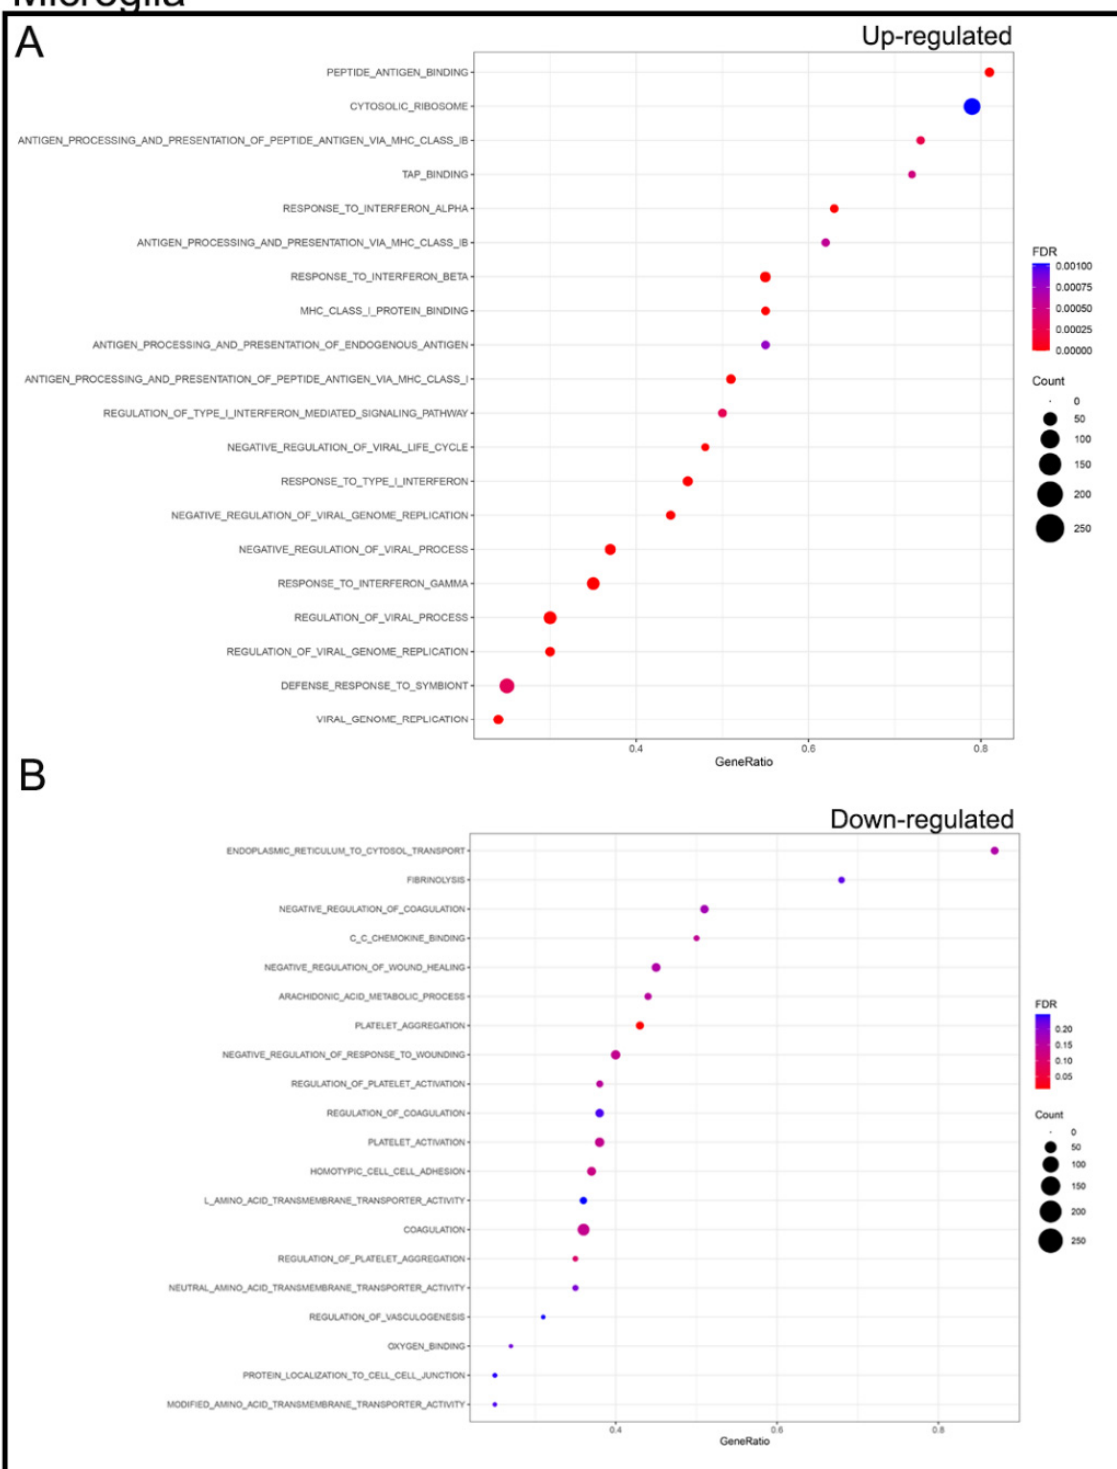

**Supplementary Figure 13. GSEA Analysis of bulk RNA-sequencing data set examining GO pathways in microglia from *Cx3cr1*<sup>CreER(Jung)</sup>*Tgfb1*<sup>fl/fl</sup> compared to controls. (A) Up-regulated and (B) down-regulated GO pathways in brain microglia three weeks after loss of microglial *Tgfb1*.**

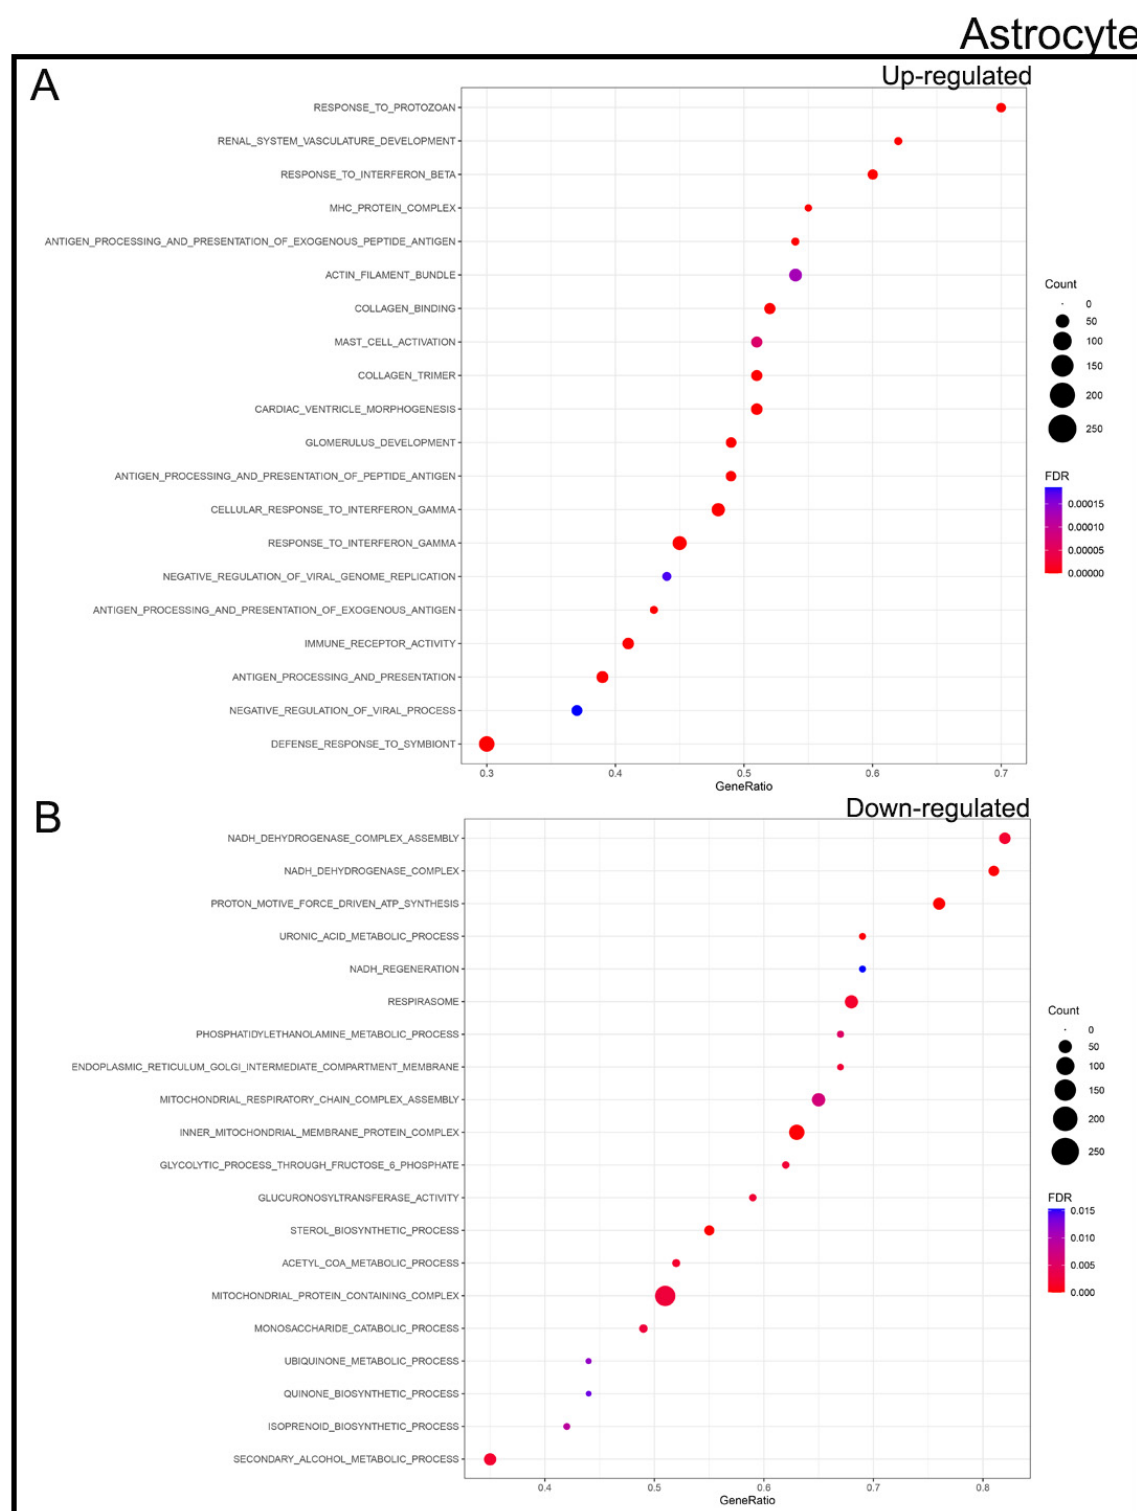

**Supplementary Figure 14. GSEA Analysis of bulk RNA-sequencing data set examining GO pathways in astrocytes from *Cx3cr1*<sup>CreER(Jung)</sup>*Tgfb1*<sup>fl/fl</sup> compared to controls. (D) Up-regulated and (E) down-regulated GO pathways of astrocytes from MG-*Tgfb1* iKO mice.**

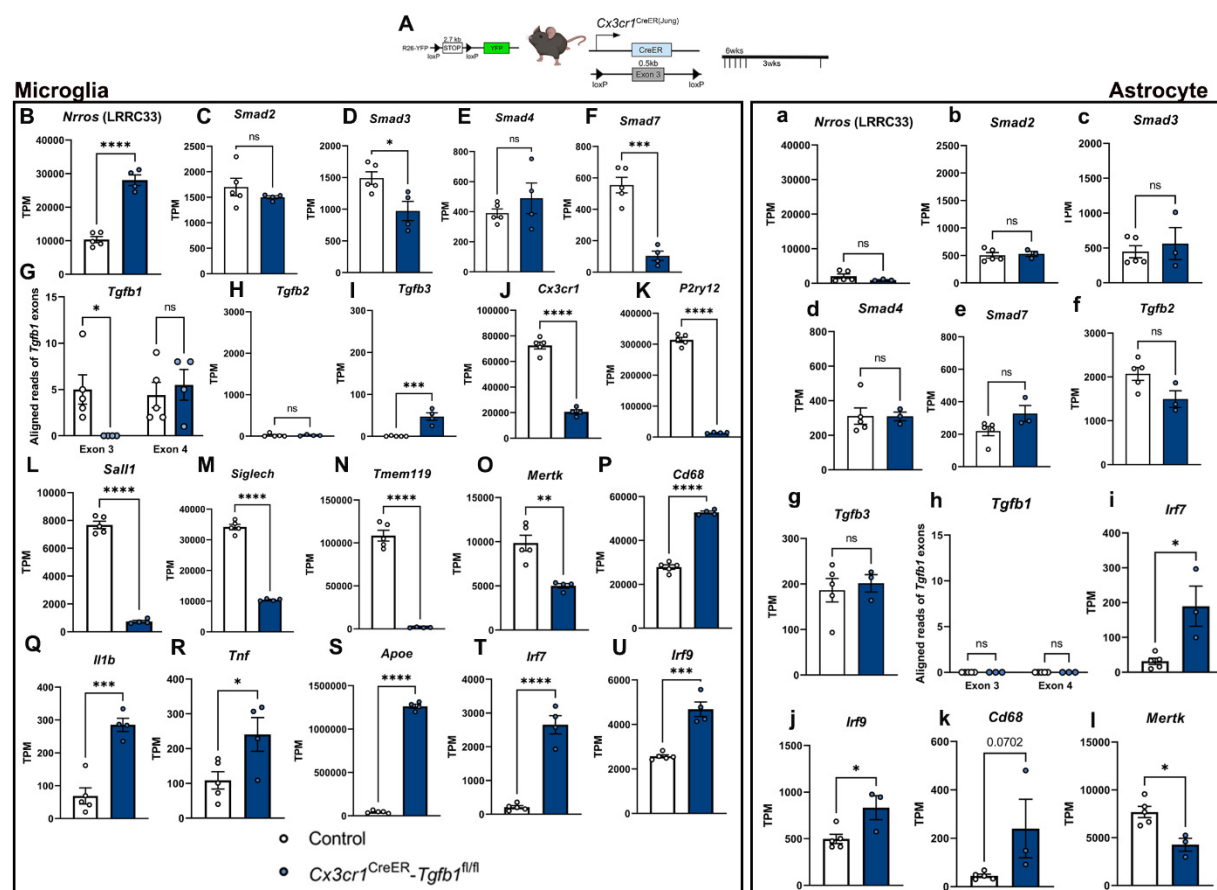

**Supplementary Fig 15. Gene expression changes observed in TGF- $\beta$  signaling pathway component genes, microglia signature genes, and pro-inflammatory genes. (A) Mouse model used. (B-I) Expression levels of TGF- $\beta$  signaling components in control microglia and MG-*Tgfb1* iKO microglia. (J-O) Expression levels of microglia signature genes and (P-U) pro-inflammatory genes. (a-h) Astrocytic expression of TGF- $\beta$  signaling pathway components in control and MG-*Tgfb1* iKO astrocytes. (i-l) Differentially expressed pro-inflammatory genes in astrocytes. \*, \*\*, \*\*\*, \*\*\*\*  $p < 0.05, 0.01, 0.001, 0.0001$ . Student's t-test, each data point represents a single animal.**
